# Supplementary material for: Aesthetic Characteristics of the Ideal Female Breast
Source: PubMed Central journal article supplement — Plast Reconstr Surg Glob Open. 2023 Jan 20;11(1):e4770. doi: 10.1097/GOX.0000000000004770 (PMC9857454; doi:10.1097/gox.0000000000004770), 2023-01-20
Supplement: gox-11-e4770-s001.pdf [file gox-11-e4770-s001.pdf]

**Supplemental Table 1. Comparison of two- and three-dimensional anatomic and morphologic characteristics across study cohort and high- and low-scoring subgroups.\***

|                                             | Entire Cohort       | Highest-Scoring Subgroup | Lowest-Scoring Subgroup | <i>p</i> -value<br>(Entire Cohort vs Highest-Scoring Subgroup) |
|---------------------------------------------|---------------------|--------------------------|-------------------------|----------------------------------------------------------------|
| <b>3D Measurements<br/>(Median and IQR)</b> | <b>n=22</b>         | <b>n=5</b>               | <b>n=5</b>              |                                                                |
| Sternal Notch to Nipple (cm)                | 21.7 (20.4-25.2)    | 21.1 (20.4-21.8)         | 21.6 (17.9-26.1)        | 0.070                                                          |
| Nipple to Nipple (cm)                       | 20.6 (19.2-23.7)    | 19.2 (18.4-19.4)         | 21.7 (16.4-27.0)        | <b>0.015</b>                                                   |
| Base Width (cm)                             | 14.3 (12.9-15.5)    | 13.4 (13.0-14.0)         | 12.9 (12.3-13.3)        | 0.050                                                          |
| Chest Wall Diameter (cm)                    | 32.7 (29.2-36.5)    | 29.8 (28.3-31.0)         | 32.0 (27.4-36.8)        | <b>0.020</b>                                                   |
| Nipple to Inframammary Fold (cm)            | 7.8 (6.8-8.8)       | 7.4 (6.3-7.9)            | 8.2 (6.7-9.1)           | <b>0.047</b>                                                   |
| Breast Volume (cm <sup>3</sup> )            | 396.9 (230.4-599.8) | 343.7 (240.4-389.8)      | 394.8 (56.8-1038.7)     | 0.060                                                          |
| <b>2D Morphology</b>                        | <b>n=25</b>         | <b>n=5</b>               | <b>n=5</b>              |                                                                |
| Fitzpatrick Skin Type                       |                     |                          |                         | 0.589                                                          |
| I                                           | 8 (32%)             | 0 (0%)                   | 1 (20%)                 |                                                                |
| II                                          | 1 (4%)              | 1 (20%)                  | 0 (0%)                  |                                                                |
| III                                         | 10 (40%)            | 3 (60%)                  | 2 (40%)                 |                                                                |
| IV                                          | 1 (4%)              | 0 (0%)                   | 0 (0%)                  |                                                                |
| V                                           | 0 (0%)              | 0 (0%)                   | 0 (0%)                  |                                                                |
| IV                                          | 5 (20%)             | 1 (20%)                  | 2 (40%)                 |                                                                |
| Upper Pole Slope                            |                     |                          |                         | 0.448                                                          |
| Linear                                      | 15 (60%)            | 4 (80%)                  | 3 (60%)                 |                                                                |
| Convex                                      | 7 (28%)             | 1 (20%)                  | 1 (20%)                 |                                                                |
| Concave                                     | 3 (12%)             | 0 (0%)                   | 1 (20%)                 |                                                                |
| Breast Contour                              |                     |                          |                         | 0.416                                                          |
| Projected                                   | 19 (76%)            | 5 (100%)                 | 2 (40%)                 |                                                                |
| Deflated                                    | 6 (24%)             | 0 (0%)                   | 3 (60%)                 |                                                                |

|             |          |         |         |       |
|-------------|----------|---------|---------|-------|
| Cleavage    |          |         |         | 0.957 |
| Minimal     | 8 (32%)  | 2 (40%) | 2 (40%) |       |
| Moderate    | 10 (40%) | 1 (20%) | 2 (40%) |       |
| Significant | 7 (28%)  | 2 (40%) | 1 (20%) |       |
| Ptosis      |          |         |         | 0.355 |
| None        | 11 (44%) | 3 (60%) | 3 (60%) |       |
| Grade 1     | 7 (28%)  | 2 (40%) | 1 (20%) |       |
| Grade 2     | 5 (20%)  | 0 (0%)  | 0 (0%)  |       |
| Grade 3     | 2 (8%)   | 0 (0%)  | 1 (20%) |       |

---

\*Listed n values represent number of patients, not number of breasts.

IQR: Inter-quartile range
